# Supplementary material for: Synthesis and photophysical properties of photostable 1,8-naphthalimide dyes incorporating benzotriazole-based UV absorbers
Source: Royal Society of Chemistry journal article supplement (doi:10.1039/d2ra02028a), 2022-01-01
Supplement: d2ra02028a1.pdf [file d2ra02028a1.pdf]

Supplementary Information

## **Synthesis and photophysical properties of photostable 1,8-naphthalimide dyes incorporating benzotriazole-based UV absorbers**

Toshiyuki Uesaka,<sup>\*ab</sup> Tomoyuki Ishitani,<sup>a</sup> Takahito Shimeno,<sup>c</sup> Naoya Suzuki,<sup>b</sup> Shigeyuki Yagi<sup>b</sup> and Takeshi Maeda,<sup>\*b</sup>

a Shipro Kasei Kaisha, LTD., Mikuni-cho, Sakai-shi, Fukui 913-0036, Japan. E-mail: t-uesaka@shiprokasei.com

b Department of Applied Chemistry, Graduate School of Engineering, Osaka Prefecture University, Naka-ku, Sakai 599-8531, Japan. E-mail: tmaeda@chem.osakafu-u.ac.jp

c Shin-Nakamura Chemical Co., LTD., Wakayama-shi 640-8390, Japan.

### **Contents**

1. Characterization data
2. Absorption and fluorescence spectra in various solvents
3. Phosphorescence spectra
4. DFT calculations
5. Properties of PMMA Films
6. NMR and MS spectra

## 1. Characterization data

### 1.1 Compound 1

Melting point: over 300 °C.  $^1\text{H}$  NMR (600 MHz, DMSO- $d_6$ ):  $\delta$  10.51 (s, 1H), 10.46 (s, 1H), 8.77-8.78 (d,  $J$  = 8.4 Hz, 1H), 8.56-8.57 (d,  $J$  = 7.2 Hz, 1H), 8.51-8.52 (d,  $J$  = 7.2 Hz, 1H), 8.35-8.36 (d,  $J$  = 8.4 Hz, 1H), 8.04-8.05 (m, 2H), 7.93-7.95 (m, 2H), 7.53-7.56 (m, 3H), 7.18-7.21 (dd,  $J$  = 8.4, 8.4 Hz, 1H), 2.30 (s, 3H).  $^{13}\text{C}$  NMR (125 MHz, DMSO- $d_6$ ):  $\delta$  170.19, 164.11, 163.52, 148.38, 144.19 (2C), 141.05, 132.81, 132.19, 131.42 (2C), 130.02, 129.56, 129.04, 128.03 (2C), 126.97, 126.27, 125.84, 124.73, 123.50, 119.94, 119.74, 118.60 (2C), 24.67. FT-IR (ATR,  $\text{cm}^{-1}$ ): 3240, 3040, 1708, 1670, 1538, 1371, 1340, 1239, 1197, 780, 748, 734. MS (ESI)  $m/z$ :  $[\text{M}+\text{Na}]^+$  Calcd for  $\text{C}_{26}\text{H}_{17}\text{N}_5\text{NaO}_4$  486.12; Found 486.08. Anal. Calcd for  $\text{C}_{26}\text{H}_{17}\text{N}_5\text{O}_4$ : C, 67.38; H, 3.70; N, 15.11. Found: C, 67.43; H, 4.02; N, 15.17.

### 1.2 Compound 3

Melting point: over 300 °C.  $^1\text{H}$  NMR (600 MHz, DMSO- $d_6$ ):  $\delta$  10.46 (s, 1H), 10.31 (s, 1H), 8.78-8.79 (d,  $J$  = 8.4 Hz, 1H), 8.57-8.58 (d,  $J$  = 7.8 Hz, 1H), 8.52-8.53 (d,  $J$  = 8.4 Hz, 1H), 8.36-8.37 (d,  $J$  = 8.4 Hz, 1H), 8.14-8.16 (m, 2H), 7.93-7.95 (dd,  $J$  = 7.8, 7.8 Hz, 1H), 7.73-7.74 (d,  $J$  = 1.8 Hz, 1H), 7.52-7.54 (dd,  $J$  = 1.8, 8.4 Hz, 1H), 7.48-7.50 (dd,  $J$  = 2.1, 8.7 Hz, 1H), 7.10-7.12 (d,  $J$  = 9.0 Hz, 1H), 2.30 (s, 3H), 1.31 (s, 9H).  $^{13}\text{C}$  NMR (125 MHz, DMSO- $d_6$ ):  $\delta$  170.17, 164.47, 163.89, 149.40, 144.27, 143.70, 142.59, 141.06, 135.46, 132.26, 131.49, 130.01, 129.60, 129.45, 128.78, 127.49, 126.95, 124.72, 123.44, 122.79, 119.92, 119.16, 118.75, 118.52, 118.02, 34.49, 31.69 (3C), 24.66. FT-IR (ATR,  $\text{cm}^{-1}$ ): 3249, 2959, 1668, 1657, 1377, 1240, 1195, 779. MS (ESI)  $m/z$ :  $[\text{M}+\text{H}]^+$  Calcd for  $\text{C}_{30}\text{H}_{26}\text{N}_5\text{O}_4$  520.20; Found 520.19. Anal. Calcd for  $\text{C}_{30}\text{H}_{25}\text{N}_5\text{O}_4$ : C, 69.35; H, 4.85; N, 13.48. Found: C, 69.13; H, 5.16; N, 13.24.

### 1.3 Compound 4

Melting point: over 300 °C. <sup>1</sup>H NMR (600 MHz, DMSO-*d*<sub>6</sub>): δ 10.43 (s, 1H), 8.74-8.75 (d, *J* = 7.8 Hz, 1H), 8.51-8.53 (d, *J* = 7.2 Hz, 1H), 8.46-8.48 (d, *J* = 7.8 Hz, 1H), 8.33-8.34 (d, *J* = 7.8 Hz, 1H), 7.90-7.92 (dd, *J* = 8.1, 8.1 Hz, 1H), 7.52-7.53 (d, *J* = 7.8 Hz, 2H), 7.27-7.28 (d, *J* = 7.8 Hz, 2H), 2.29 (s, 3H), 1.35 (s, 9H). <sup>13</sup>C NMR (150 MHz, DMSO-*d*<sub>6</sub>): δ 170.16, 164.36, 163.79, 150.95, 140.93, 133.87, 132.19, 131.40 (2C), 129.88, 129.27, 129.06 (2C), 126.90, 126.19, 124.63, 123.31, 119.87, 118.42, 34.98, 31.73 (3C), 24.64. FT-IR (ATR, cm<sup>-1</sup>): 3332, 2951, 1712, 1663, 1506, 1374, 1237, 1199, 783, 562. MS (ESI) *m/z*: [M+Na]<sup>+</sup> Calcd for C<sub>24</sub>H<sub>22</sub>N<sub>2</sub>NaO<sub>3</sub> 409.15; Found 409.11. Anal. Calcd for C<sub>24</sub>H<sub>22</sub>N<sub>2</sub>O<sub>3</sub>: C, 74.59; H, 5.74; N, 7.25. Found: C, 74.73; H, 5.88; N, 7.32.

### 1.4 Compound 5

Melting point: 129 °C. <sup>1</sup>H NMR (600 MHz, DMSO-*d*<sub>6</sub>): δ 10.53 (s, 1H), 8.02-8.04 (m, 2H), 7.80-7.81 (dd, *J* = 1.8, 8.4 Hz, 1H), 7.52-7.54 (m, 2H), 7.42-7.45 (m, 1H), 7.16-7.17 (d, *J* = 7.8 Hz, 1H), 7.03-7.06 (dd, *J* = 8.1, 8.1 Hz, 1H). <sup>13</sup>C NMR (150 MHz, DMSO-*d*<sub>6</sub>): δ 151.47, 144.09 (2C), 131.65, 131.63, 127.87 (2C), 125.83, 120.09, 118.52 (2C), 118.44. FT-IR (ATR, cm<sup>-1</sup>): 3097, 1490, 1256, 1221, 741, 684, 656, 472. MS (ESI) *m/z*: [2M-H]<sup>-</sup> Calcd for C<sub>24</sub>H<sub>17</sub>N<sub>6</sub>O<sub>2</sub> 421.14; Found 420.57. Anal. Calcd for C<sub>12</sub>H<sub>9</sub>N<sub>3</sub>O: C, 68.24; H, 4.29; N, 19.89. Found: C, 68.59; H, 4.46; N, 19.94.

### 1.5 Compound 6

Melting point: 153°C. <sup>1</sup>H NMR (500 MHz, DMSO-*d*<sub>6</sub>): δ 10.51 (s, 1H), 8.07-8.08 (m, 2H), 7.54-7.57 (m, 3H), 7.15 (s, 1H), 3.47 (br, 2H), 1.71 (s, 2H), 1.34 (s, 6H), 0.74 (s, 9H). <sup>13</sup>C NMR (125 MHz, DMSO-*d*<sub>6</sub>): δ 143.76 (2C), 142.11, 138.96, 129.87, 128.29 (2C), 126.69, 119.18, 118.49

(2C), 115.07, 56.60, 38.40, 32.64, 32.14 (3C), 31.76 (2C). FT-IR (ATR,  $\text{cm}^{-1}$ ): 3445, 3364, 3059, 2955, 1512, 1219, 751, 725, 659. MS (ESI)  $m/z$ :  $[\text{M}]^+$  Calcd for  $\text{C}_{20}\text{H}_{26}\text{N}_4\text{O}$  338.21; Found 338.56.

## 2. Absorption and fluorescence spectra in various solvents

**Table S1** Optical properties of **1-5** and the equimolar mixture of **4** and **5** in various solvents.<sup>a</sup>

| Compd                    | Solvent            | $\lambda_{abs}$<br>(nm) | $\epsilon_{max}$ | $\lambda_F$<br>(nm) | $\lambda_{EX}$<br>(nm) | Stokes<br>shift<br>( $\text{cm}^{-1}$ ) | $\Phi_F$<br>(%) | $\tau$ (ns)<br>( $\chi^2$ ) <sup>d</sup> | $k_r$<br>( $\text{ns}^{-1}$ ) | $k_{nr}$<br>( $\text{ns}^{-1}$ ) |
|--------------------------|--------------------|-------------------------|------------------|---------------------|------------------------|-----------------------------------------|-----------------|------------------------------------------|-------------------------------|----------------------------------|
| <b>1</b>                 | CH <sub>3</sub> OH | 337                     | 27000            | 466                 | 370                    | 5570                                    | 56.2            | 5.2 (1.03)                               | 0.11                          | 0.084                            |
|                          | CHCl <sub>3</sub>  | 340                     | 27700            | 443                 | 372                    | 4310                                    | 27.8            | 2.1 (1.09)                               | 0.13                          | 0.34                             |
|                          | DMSO               | 370                     | 16200            | 464                 | 373                    | 5260                                    | 27.8            | 2.5 (1.07)                               | 0.11                          | 0.28                             |
| <b>2</b>                 | CH <sub>3</sub> OH | 342                     | 28000            | 468                 | 373                    | 5440                                    | 7.5             | 0.79 (1.01)                              | 0.10                          | 1.2                              |
|                          | CHCl <sub>3</sub>  | 350                     | 28500            | 473                 | 379                    | 5240                                    | 2.8             | 1.4 (1.02)                               | 0.020                         | 0.68                             |
|                          | DMSO               | 364                     | 17600            | 465                 | 375                    | 5160                                    | 7.4             | 0.68 (1.04)                              | 0.11                          | 1.4                              |
| <b>3</b>                 | CH <sub>3</sub> OH | 356                     | 20200            | 466                 | 376                    | 5140                                    | 41.7            | 4.3 (1.06)                               | 0.10                          | 0.14                             |
|                          | CHCl <sub>3</sub>  | 359                     | 31500            | 444                 | 380                    | 3790                                    | 5.1             | 0.82 (1.08)                              | 0.062                         | 1.2                              |
|                          | DMSO               | 371                     | 17700            | 464                 | 375                    | 5120                                    | 39.1            | 2.8 (1.02)                               | 0.14                          | 0.22                             |
| <b>4<sup>b</sup></b>     | CH <sub>3</sub> OH | 364                     | 14900            | 465                 | 368                    | 5670                                    | 82.6            | 7.3 (1.04)                               | 0.11                          | 0.024                            |
|                          | CHCl <sub>3</sub>  | 365                     | 15100            | 444                 | 370                    | 4510                                    | 46.5            | 2.9 (1.02)                               | 0.16                          | 0.19                             |
|                          | DMSO               | 374                     | 15000            | 464                 | 373                    | 5260                                    | 54.6            | 3.8 (1.09)                               | 0.14                          | 0.12                             |
| <b>5<sup>c</sup></b>     | CH <sub>3</sub> OH | 328                     | 17300            | 392                 | 313                    | 6440                                    | 0.8             | 0.057 (1.08)                             | 0.14                          | 18                               |
|                          | CHCl <sub>3</sub>  | 333                     | 18600            | 392                 | 315                    | 6240                                    | 0.6             | 1.1 (1.04)                               | 0.0054                        | 0.90                             |
|                          | DMSO               | 289                     | 13100            | 419                 | 285                    | 11220                                   | 1.2             | 0.26 (1.05)                              | 0.046                         | 3.8                              |
| <b>4 + 5<sup>b</sup></b> | CH <sub>3</sub> OH | 335                     | 13400            | 468                 | 370                    | 5660                                    | 87.1            | 8.1 (1.05)                               | 0.11                          | 0.016                            |
|                          | CHCl <sub>3</sub>  | 339                     | 15300            | 444                 | 372                    | 4360                                    | 48.2            | 3.2 (1.09)                               | 0.15                          | 0.16                             |
|                          | DMSO               | 372                     | 8000             | 464                 | 374                    | 5190                                    | 56.5            | 4.2 (1.05)                               | 0.14                          | 0.10                             |

<sup>a</sup>Conc. 20  $\mu\text{M}$ . <sup>b</sup>Conc. 30  $\mu\text{M}$ . <sup>c</sup>Conc. 50  $\mu\text{M}$ . <sup>d</sup>Lifetimes were determined by fitting the decay curves with a single-exponential decay function. The quantities that express the mismatch between data and fitted function ( $\chi^2$ ) are shown in parentheses.

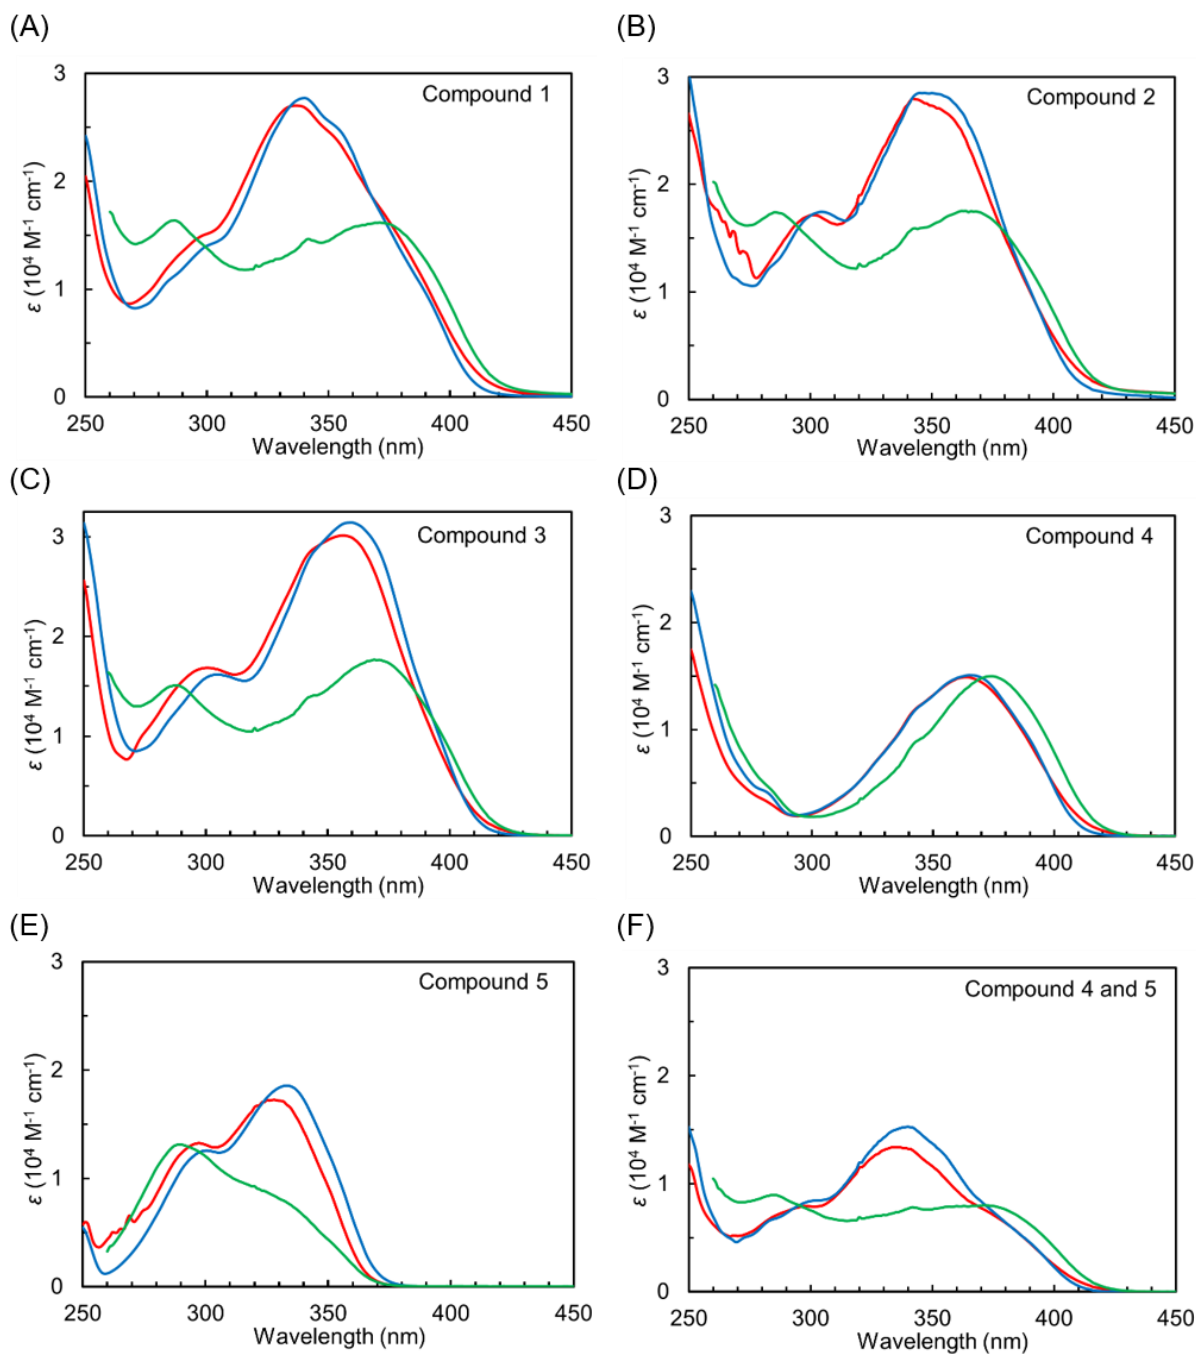

**Fig. S1** UV-vis absorption spectra of **1** (A), **2** (B), **3** (C), **4** (D), **5** (E), and the equimolar mixture of **4** and **5** (F) in  $\text{CH}_3\text{OH}$  (red),  $\text{CHCl}_3$  (blue), and  $\text{DMSO}$  (green).

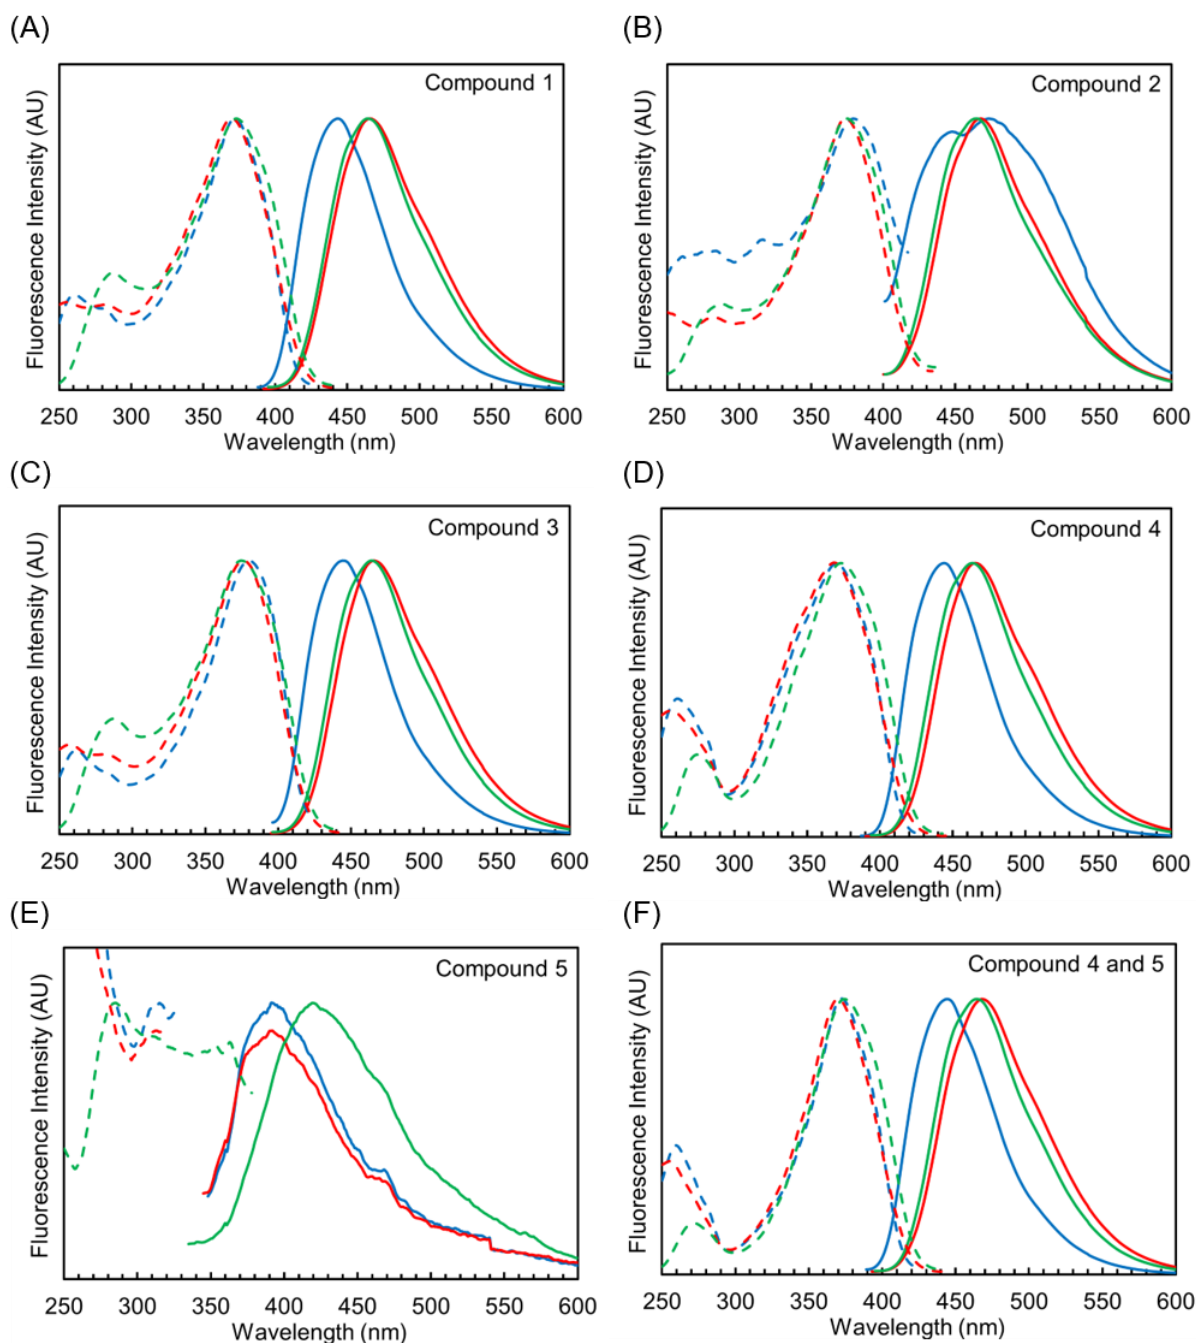

**Fig. S2** Fluorescence (solid-line) and excitation (dot-line) spectra of **1** (A), **2** (B), **3** (C), **4** (D), **5** (E), and the equimolar mixture of **4** and **5** (F) in CH<sub>3</sub>OH (red), CHCl<sub>3</sub> (blue), and DMSO (green).

### 3. Phosphorescence spectra

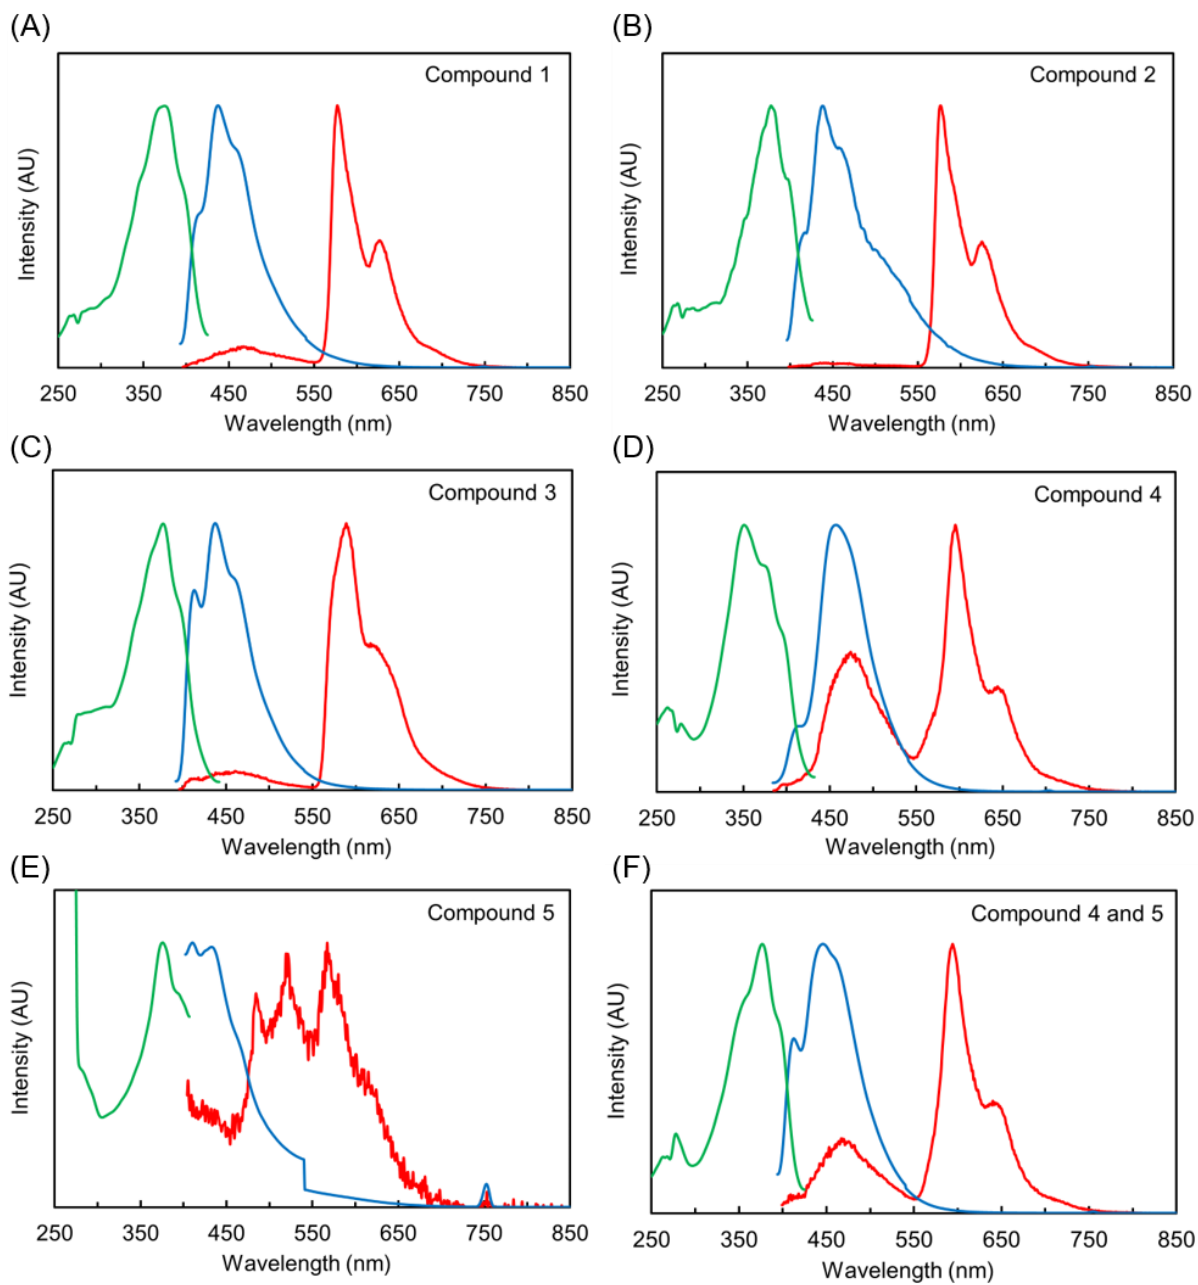

**Fig. S3** Phosphorescence (red), fluorescence (blue), and excitation (green) spectra of **1** (A), **2** (B), **3** (C), **4** (D), **5** (E), and the equimolar mixture of **4** and **5** (F) in toluene at 77 K.

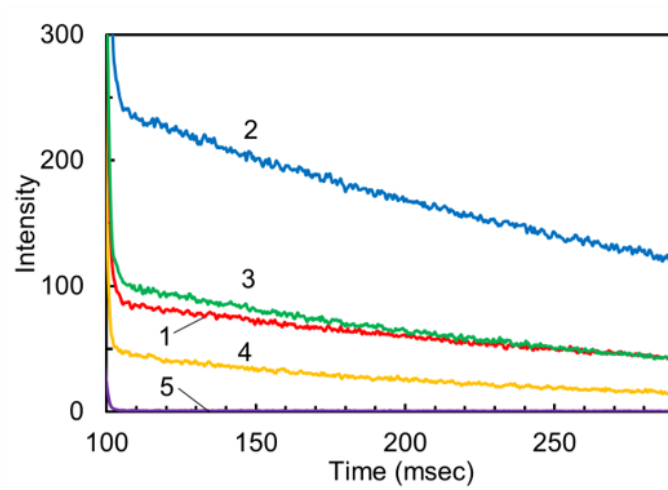

**Fig. S4** Phosphorescence lifetimes of 1-5. After 100 msec, the excitation light was shut off.



#### 4. DFT calculations

The geometries of the ground states and excited states for **1-3** were optimized in CH<sub>3</sub>OH by DFT and time-dependent DFT (TD-DFT) calculations with the Gaussian 09 program.<sup>1</sup> The calculations were performed with the CAM-B3LYP exchange-correlation functional under a 6-31G+(d) basis set.

**Table S2** Geometrical parameters and total energies of optimized structures for S<sub>0</sub>, neutral S<sub>1</sub>, and zwitterionic S<sub>1</sub> of **1-3** calculated at the CAM-B3LYP/6-31G+(d) (solvent: CH<sub>3</sub>OH). The calculations of **2** were performed on the models in which 1,1,3,3-tetramethylbutyl groups were replaced with *tert*-butyl groups.

| Compd    | Optimized structures        | $\varphi_{\text{BTA-NI}}$ (°) <sup>a</sup> | $\varphi_{\text{BT-PH}}$ (°) <sup>b</sup> | C-N (Å) <sup>c</sup> | O-H (Å) <sup>d</sup> | N-H (Å) <sup>e</sup> | Total energies (hartree) |
|----------|-----------------------------|--------------------------------------------|-------------------------------------------|----------------------|----------------------|----------------------|--------------------------|
| <b>1</b> | S <sub>0</sub>              | 87.4                                       | 0.23                                      | 1.44                 | 0.99                 | 1.76                 | -1575.01637              |
|          | neutral S <sub>1</sub>      | 87.9                                       | 0.35                                      | 1.43                 | 0.99                 | 1.76                 | -1574.89759              |
|          | zwitterionic S <sub>1</sub> | 85.0                                       | 11.2                                      | 1.43                 | 1.99                 | 1.02                 | -1574.89575              |
| <b>2</b> | S <sub>0</sub>              | 87.6                                       | 0.14                                      | 1.44                 | 0.99                 | 1.76                 | -1732.17643              |
|          | neutral S <sub>1</sub>      | 87.0                                       | 0.16                                      | 1.44                 | 0.99                 | 1.76                 | -1732.05764              |
|          | zwitterionic S <sub>1</sub> | 86.7                                       | 13.7                                      | 1.43                 | 2.02                 | 1.02                 | -1732.05857              |
| <b>3</b> | S <sub>0</sub>              | 87.3                                       | 1.82                                      | 1.44                 | 0.99                 | 1.78                 | -1732.17562              |
|          | neutral S <sub>1</sub>      | 87.0                                       | 1.09                                      | 1.44                 | 0.99                 | 1.78                 | -1732.05707              |
|          | zwitterionic S <sub>1</sub> | 88.6                                       | 15.6                                      | 1.44                 | 2.01                 | 1.03                 | -1732.05817              |

<sup>a</sup>Dihedral angles between the 2-(2-hydroxyphenyl)-2*H*-benzotriazole and the 1,8-naphthalimide.

<sup>b</sup>Dihedral angles between the benzotriazole group and the phenyl group.

<sup>c</sup>Bond lengths between the carbon atom of the 2-(2-hydroxyphenyl)-2*H*-benzotriazole and the nitrogen atom of the 1,8-naphthalimide.

<sup>d</sup>Bond lengths of the hydroxy group.

<sup>e</sup>Bond lengths between the nitrogen atom of the benzotriazole group and the hydrogen atom of the hydroxy group.

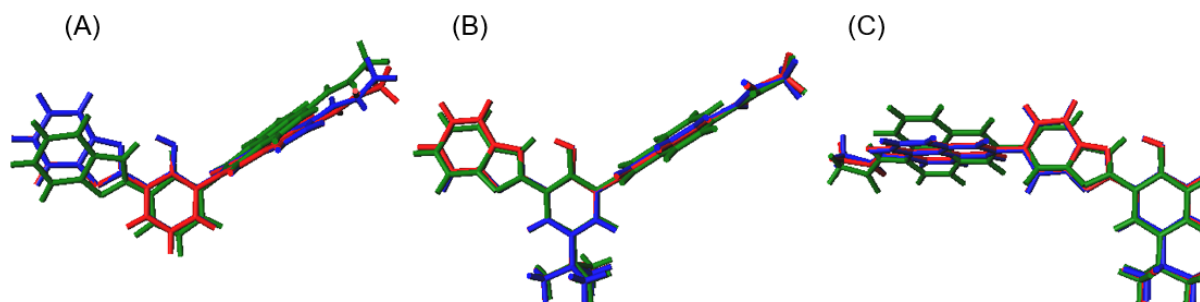

**Fig. S5** Comparisons of the optimized structures of the S<sub>0</sub> (red), the neutral S<sub>1</sub> (blue), and the zwitterionic S<sub>1</sub> (green) for **1** (A), **2** (B), and **3** (C) calculated at the CAM-B3LYP/6-31G+(d) (solvent: CH<sub>3</sub>OH). The calculations of **2** were performed on the models in which 1,1,3,3-tetramethylbutyl groups were replaced with *tert*-butyl groups.

## 5. Properties of PMMA Films

**Table S3** Optical properties of **1-5** and the equimolar mixture of **4** and **5** in PMMA films<sup>a</sup>.

| Compd          | $\lambda_{abs}$<br>(nm) | $\lambda_F$<br>(nm) | $\lambda_{EX}$<br>(nm) | Stokes shift<br>(cm <sup>-1</sup> ) | $\Phi_F$<br>(%) |
|----------------|-------------------------|---------------------|------------------------|-------------------------------------|-----------------|
| <b>1</b>       | 340                     | 449                 | 375                    | 4400                                | 32.7            |
| <b>2</b>       | 349                     | 475                 | 403                    | 3760                                | 17.9            |
| <b>3</b>       | 361                     | 450                 | 389                    | 3490                                | 19.6            |
| <b>4</b>       | 370                     | 447                 | 370                    | 4660                                | 51.2            |
| <b>5</b>       | 333                     | 394                 | 305                    | 7410                                | 0.1             |
| <b>4 and 5</b> | 339                     | 445                 | 376                    | 4120                                | 58.6            |

<sup>a</sup>2.5 wt% doped films.

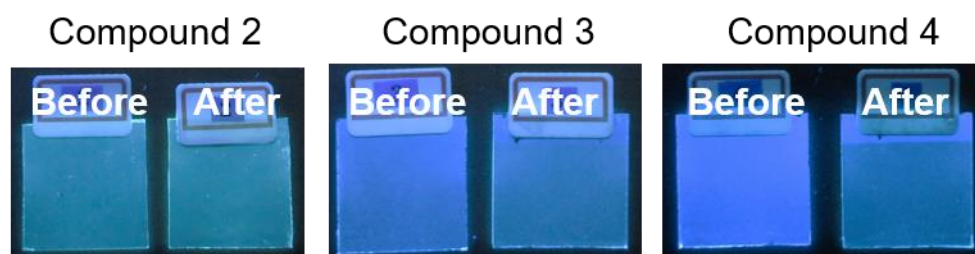

**Fig. S6** The photographs under UV light (365nm) of PMMA films doped with **2-4** before and after simulated solar light irradiation.

## 6. NMR and MS spectra

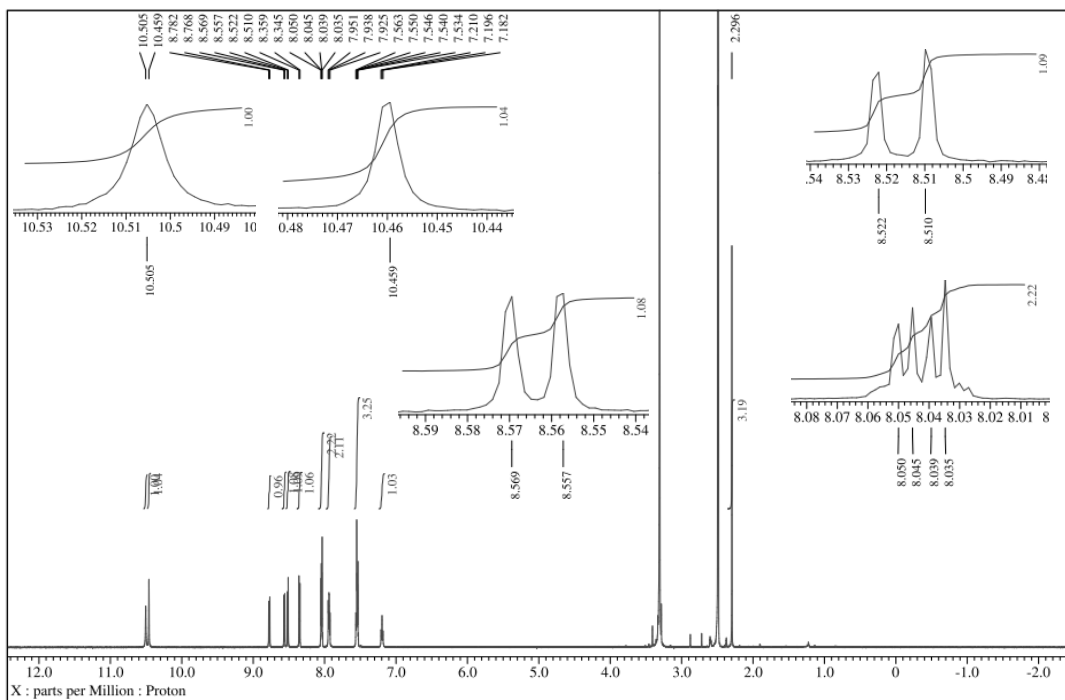

**Fig. S7**  $^1\text{H}$  NMR spectra of **1** (600 MHz,  $\text{DMSO-}d_6$ , 298K).

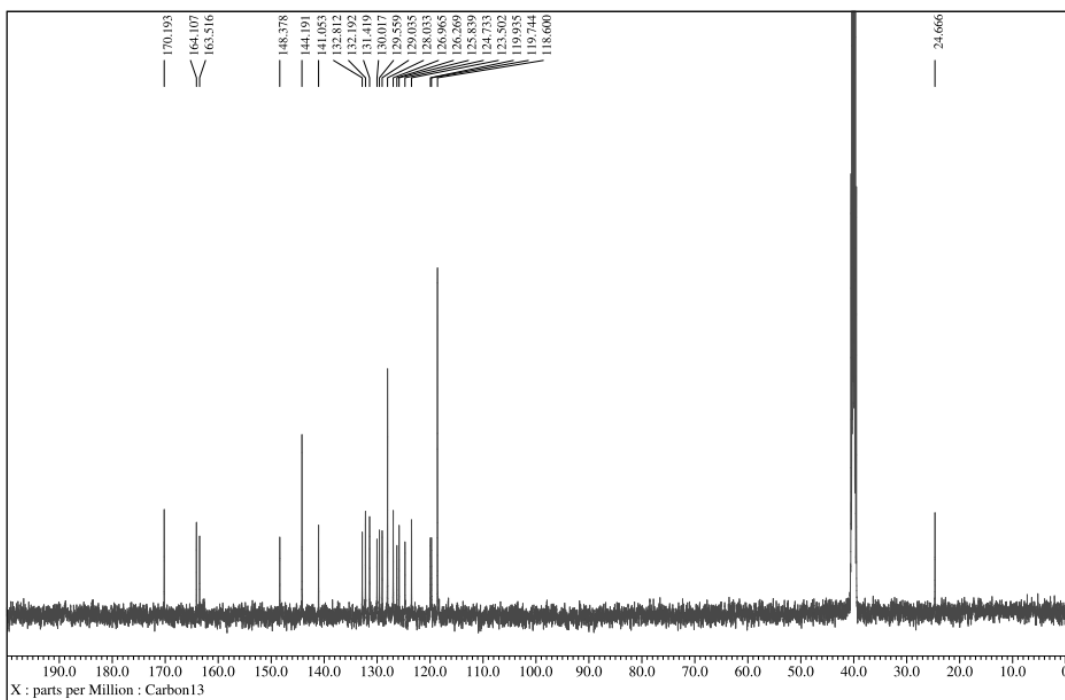

**Fig. S8**  $^{13}\text{C}$  NMR spectra of **1** (125 MHz,  $\text{DMSO-}d_6$ , 298K).

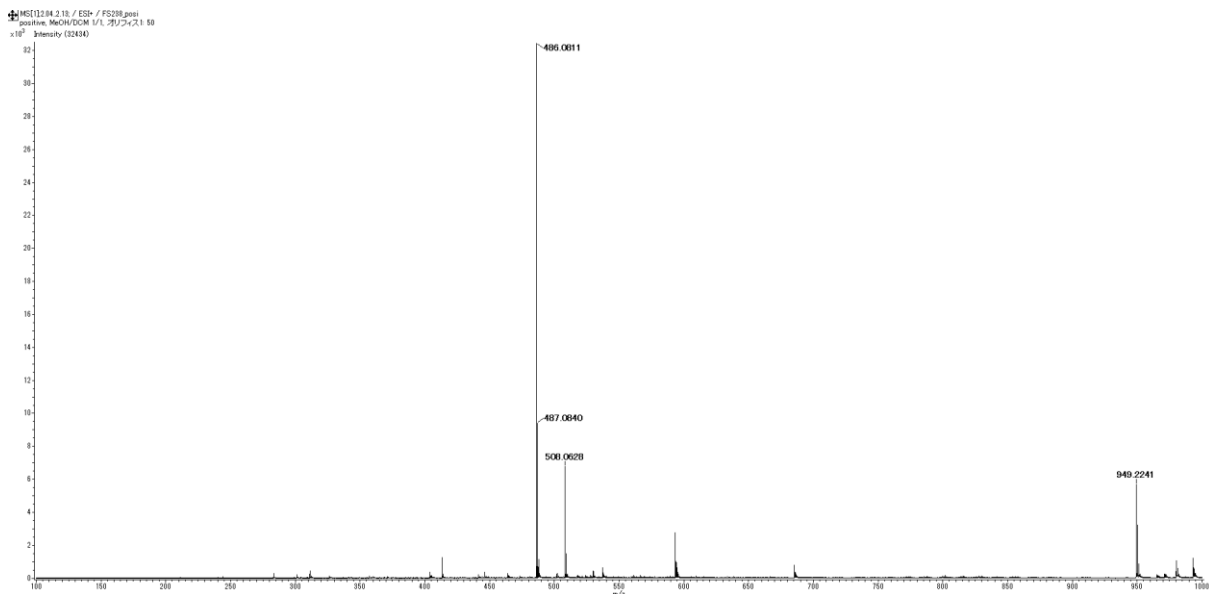

**Fig. S9** ESI MS-spectra for **1**.

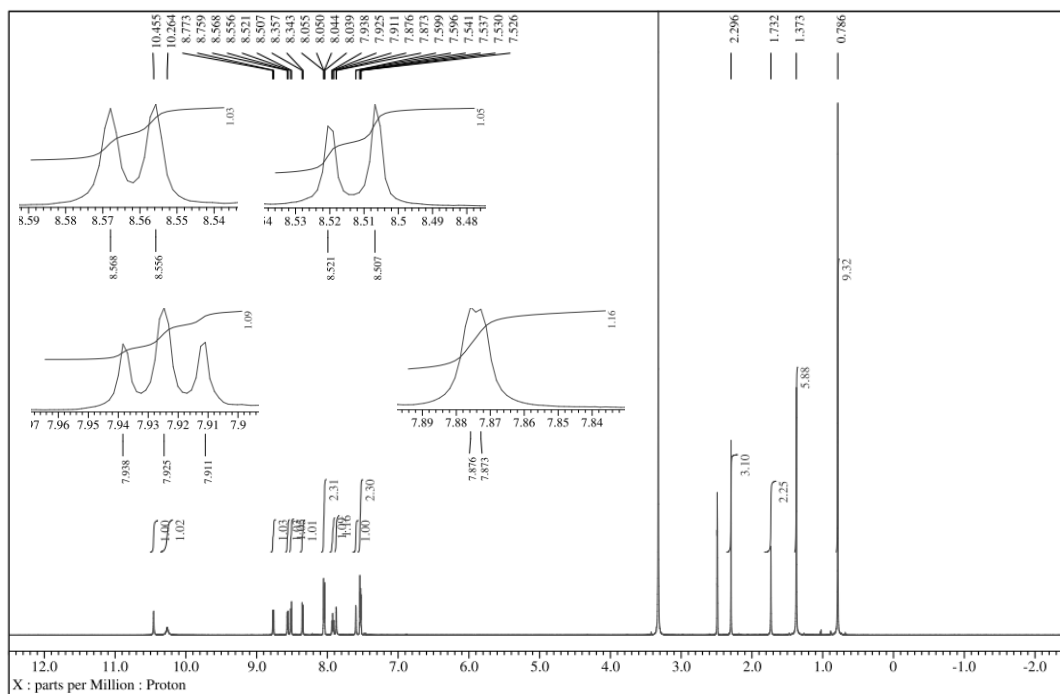

**Fig. S10**  $^1\text{H}$  NMR spectra of **2** (600 MHz,  $\text{DMSO-}d_6$ , 298K).

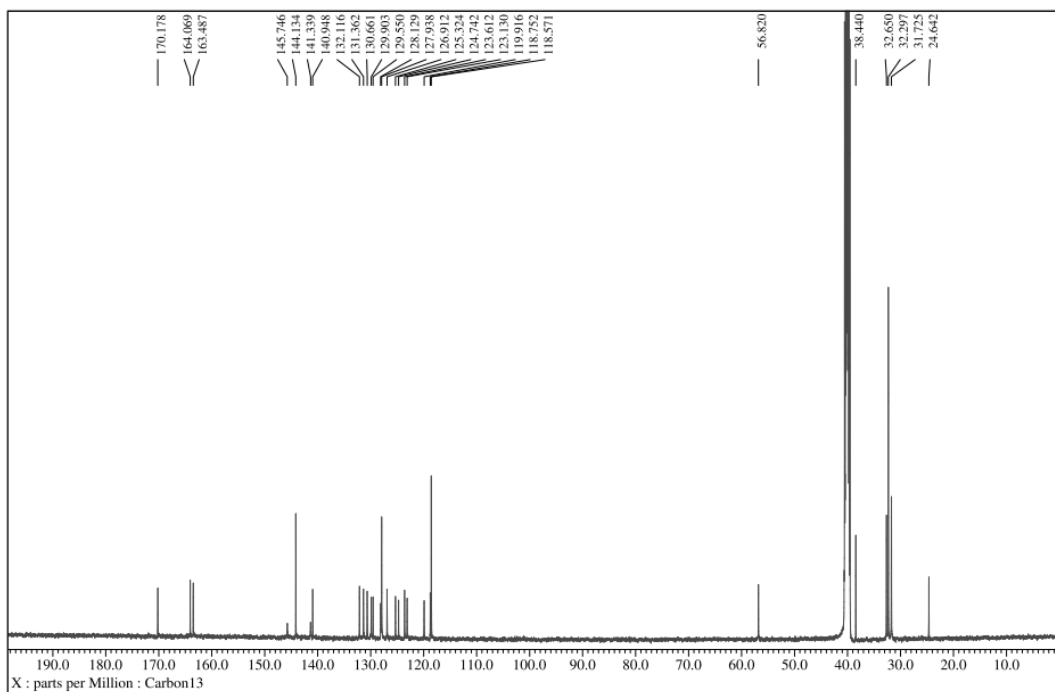

**Fig. S11**  $^{13}\text{C}$  NMR spectra of **2** (125 MHz,  $\text{DMSO-}d_6$ , 298K).

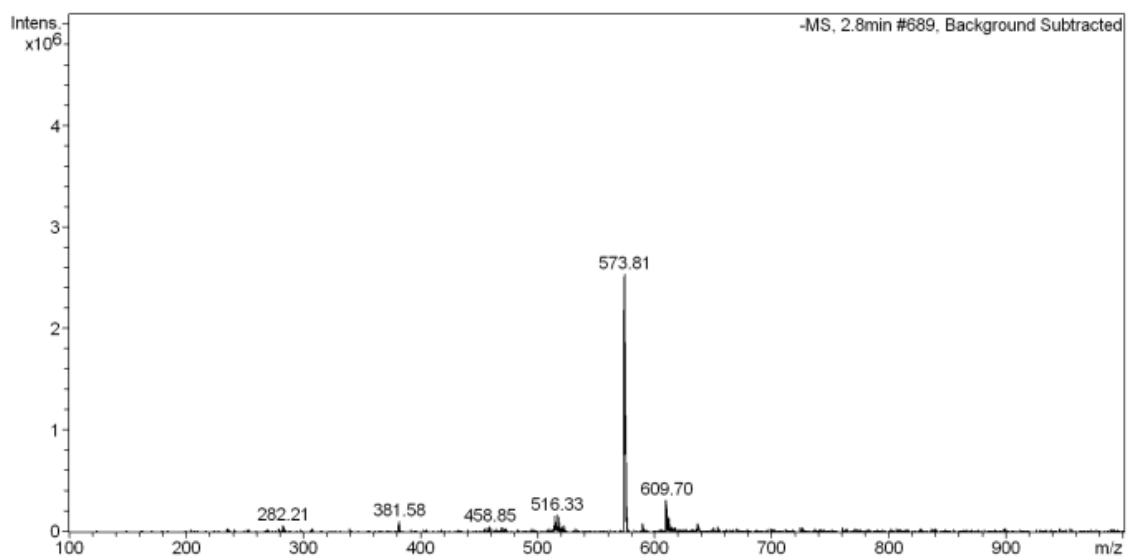

**Fig. S12** ESI MS-spectra for **2**.

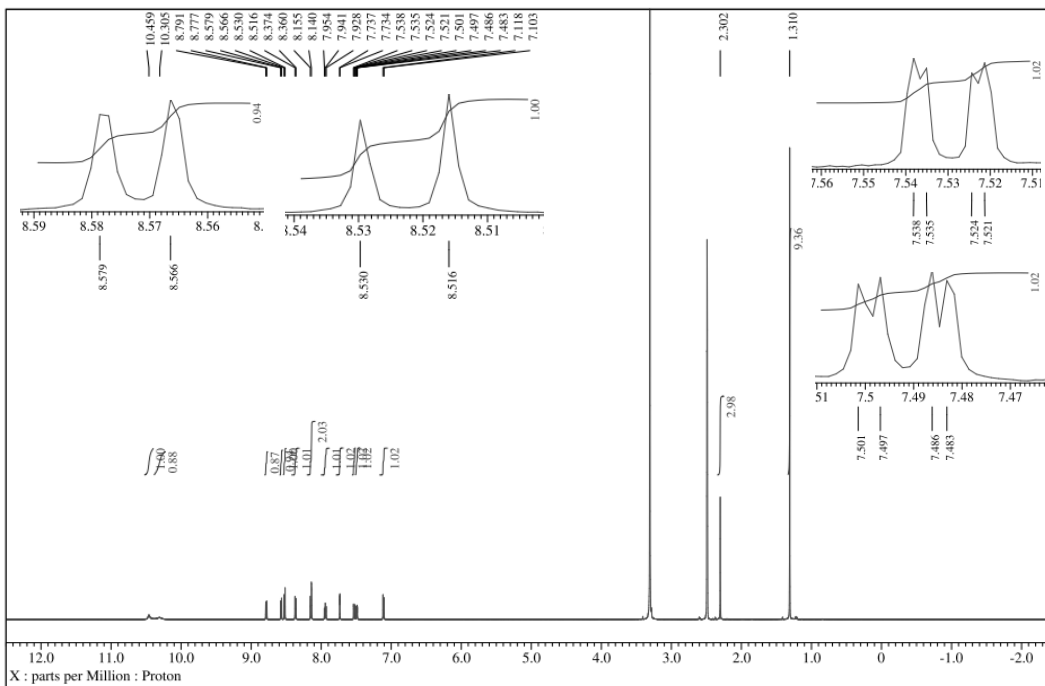

**Fig. S13**  $^1\text{H}$  NMR spectra of **3** (600 MHz,  $\text{DMSO-}d_6$ , 298K).

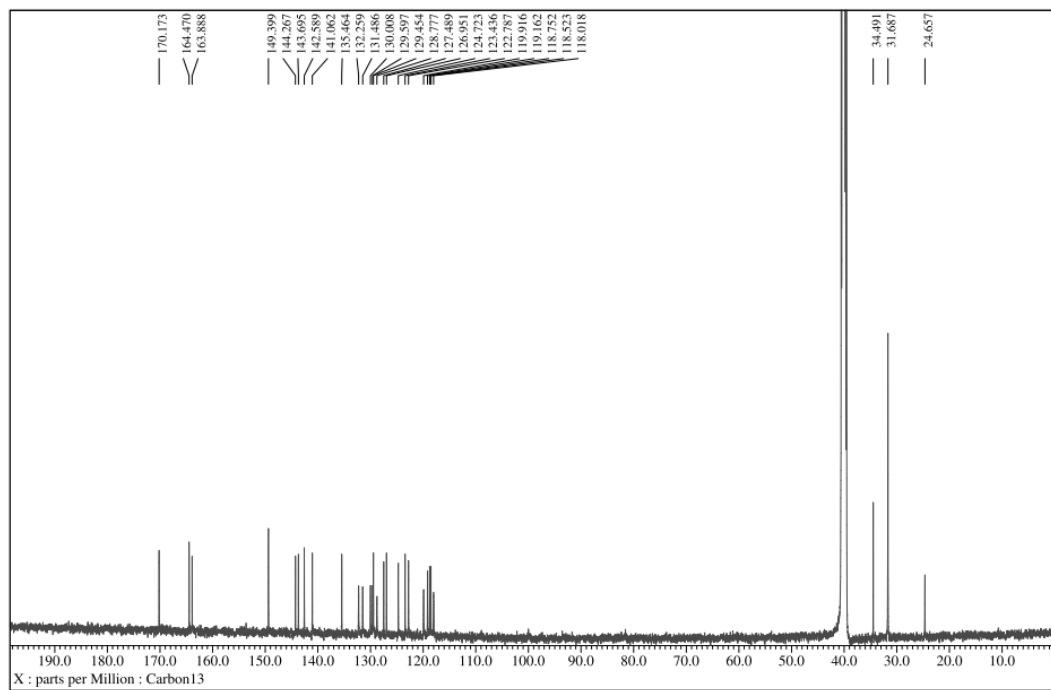

**Fig. S14**  $^{13}\text{C}$  NMR spectra of **3** (125 MHz,  $\text{DMSO-}d_6$ , 298K).

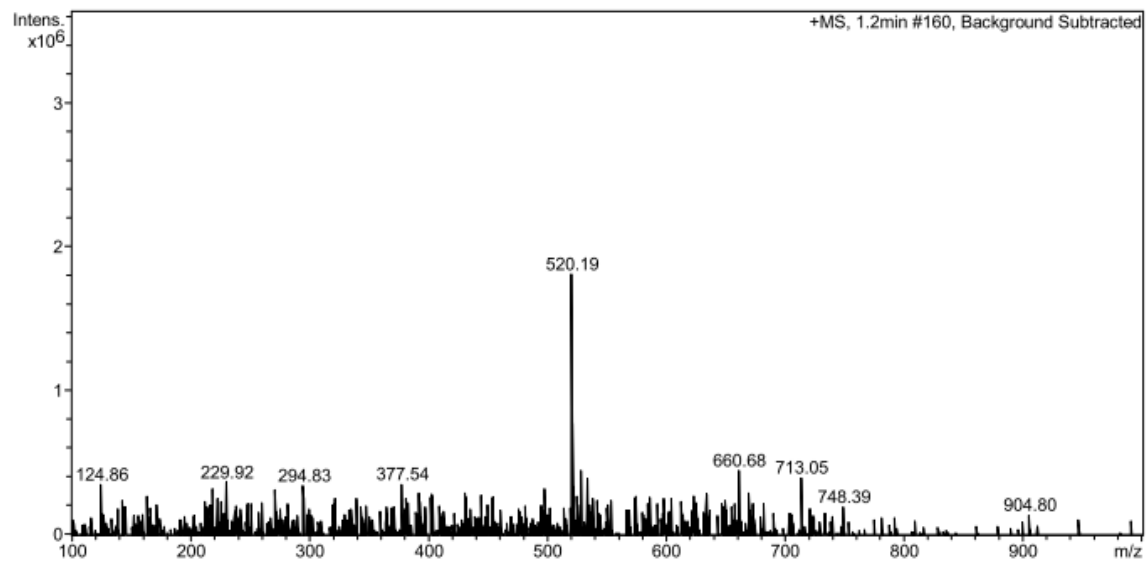

**Fig. S15** ESI MS-spectra for **3**.

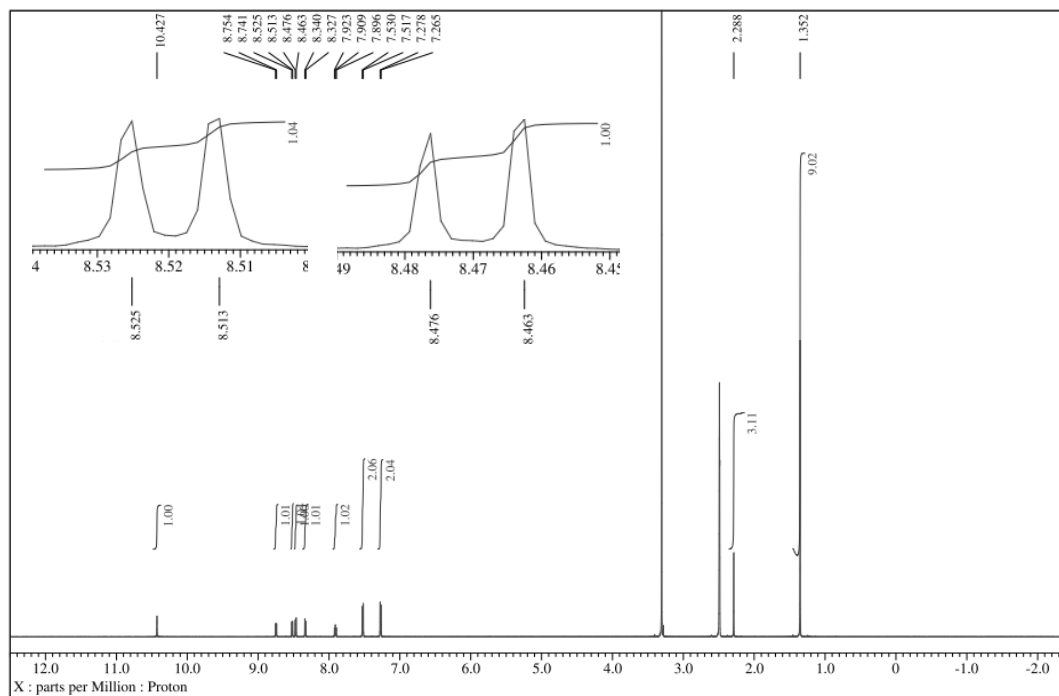

**Fig. S16** <sup>1</sup>H NMR spectra of **4** (600 MHz, DMSO-*d*<sub>6</sub>, 298K).

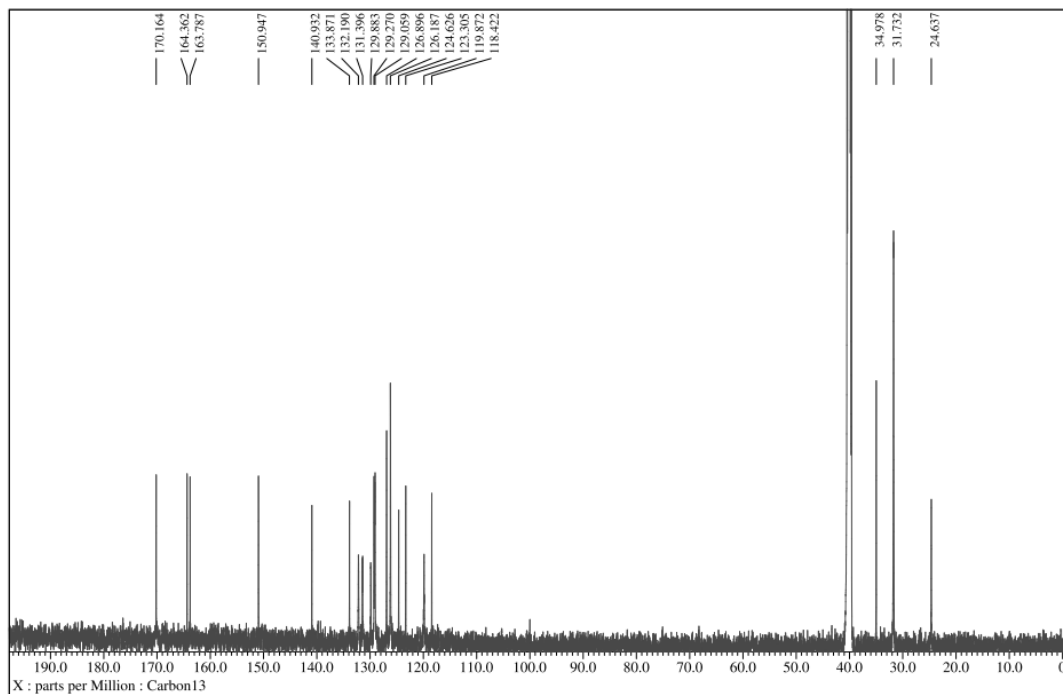

**Fig. S17**  $^{13}\text{C}$  NMR spectra of **4** (150 MHz,  $\text{DMSO-}d_6$ , 298K).

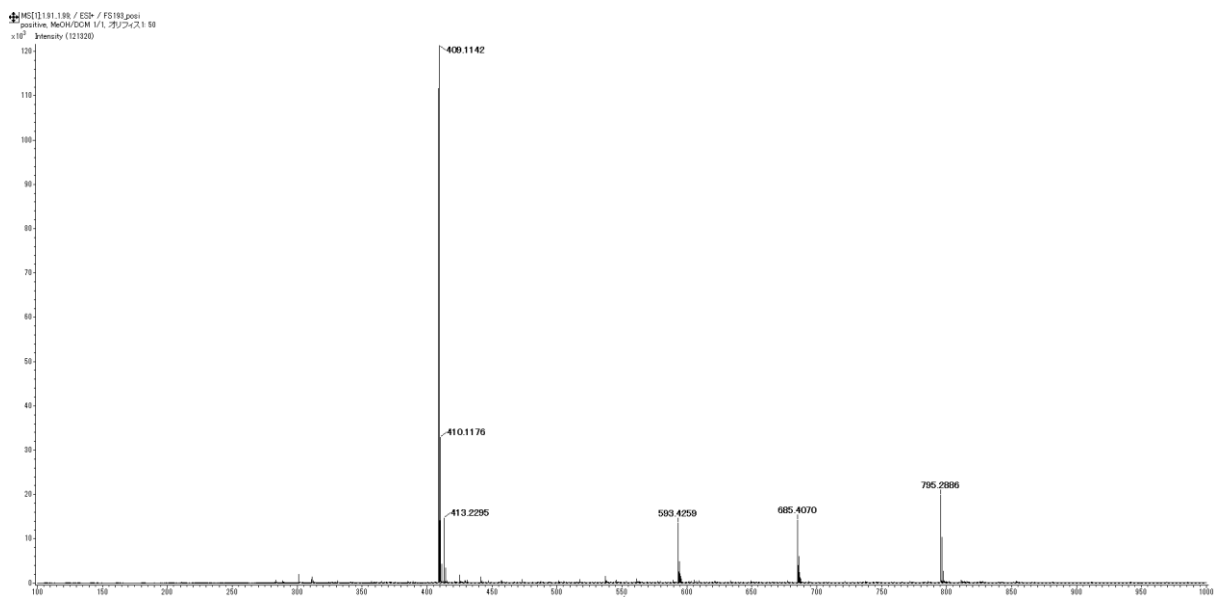

**Fig. S18** ESI MS-spectra for **4**.



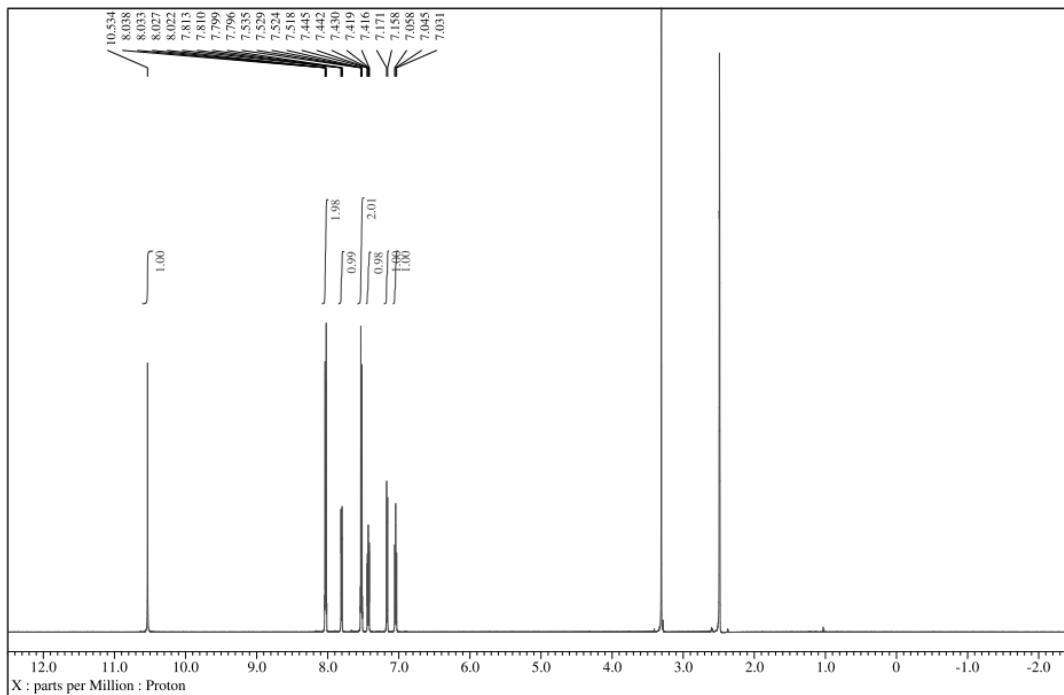

**Fig. S19**  $^1\text{H}$  NMR spectra of **5** (600 MHz,  $\text{DMSO-}d_6$ , 298K).

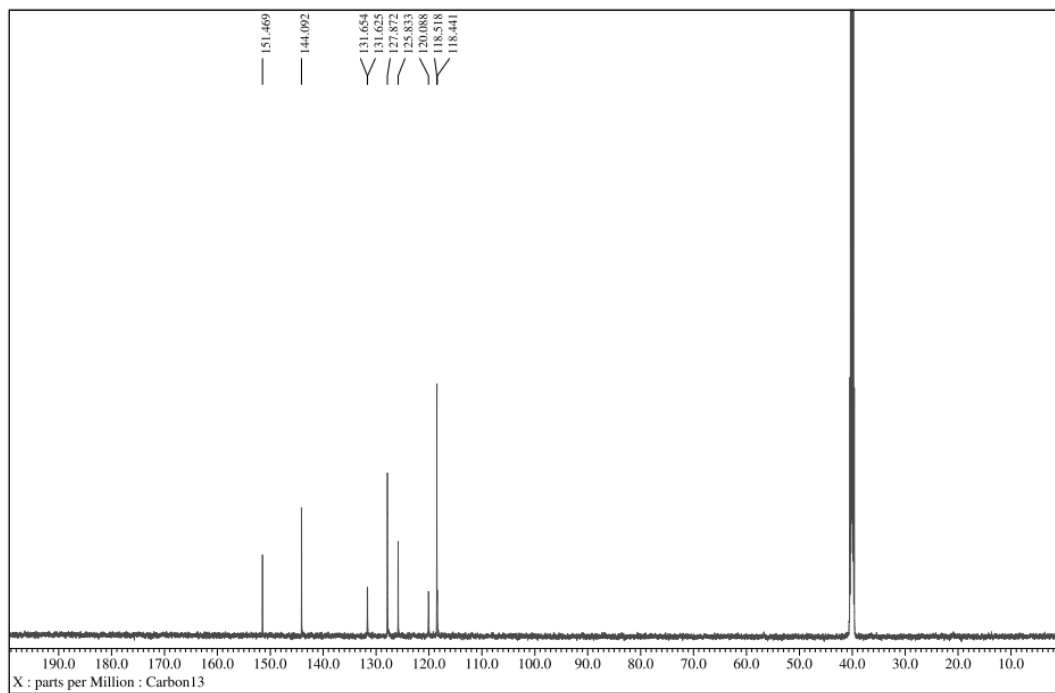

**Fig. S20**  $^{13}\text{C}$  NMR spectra of **5** (150 MHz,  $\text{DMSO-}d_6$ , 298K).

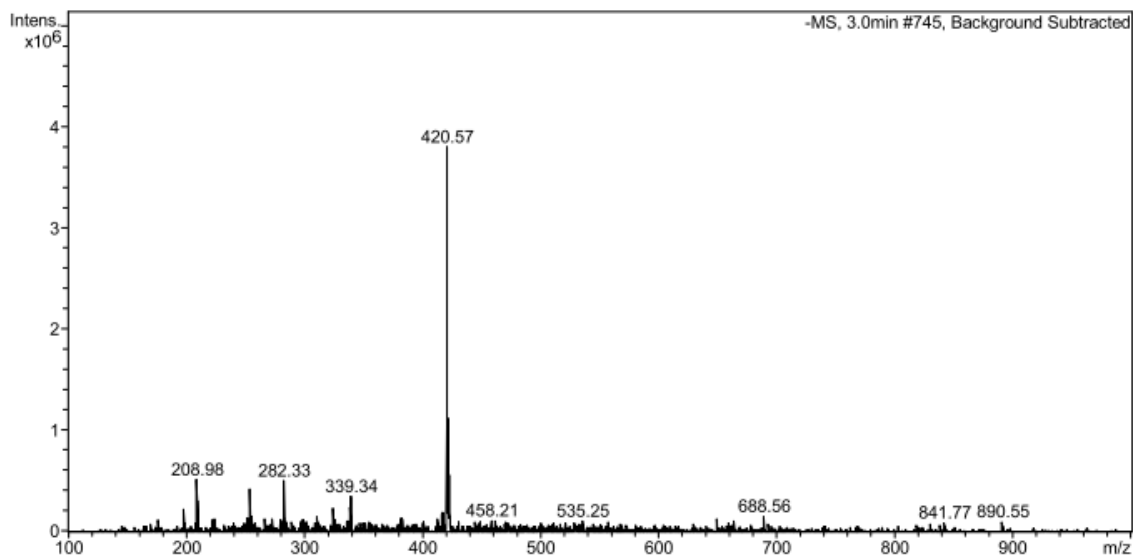

**Fig. S21** ESI MS-spectra for **5**.

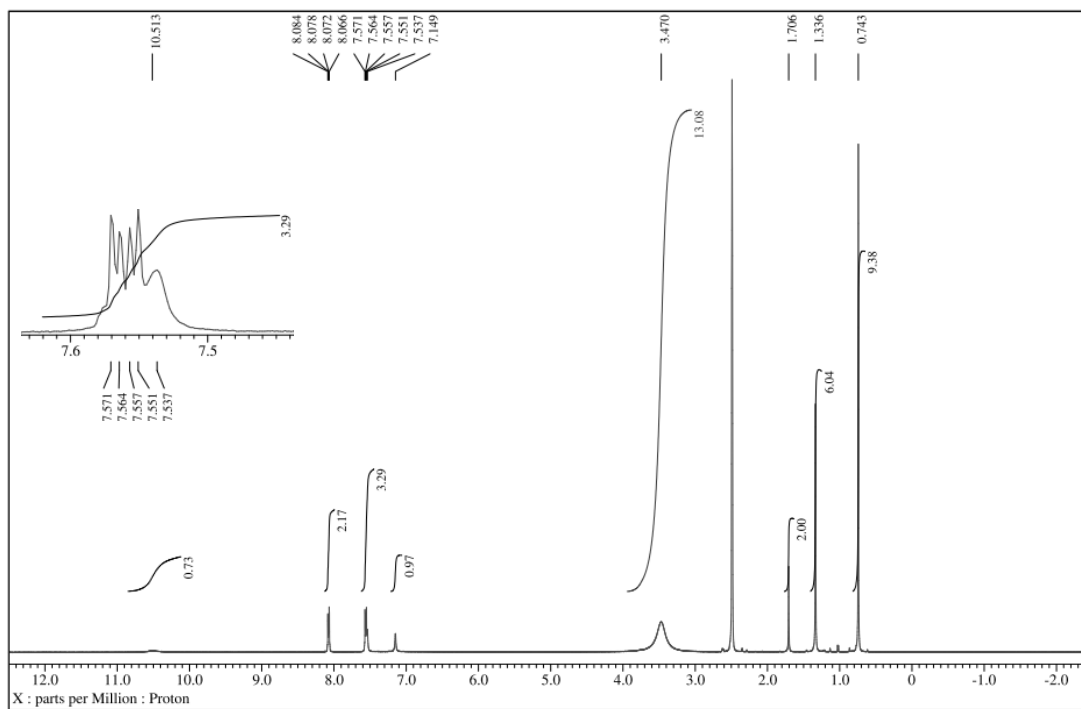

**Fig. S22** <sup>1</sup>H NMR spectra of **6** (500 MHz, DMSO-*d*<sub>6</sub>, 298K).

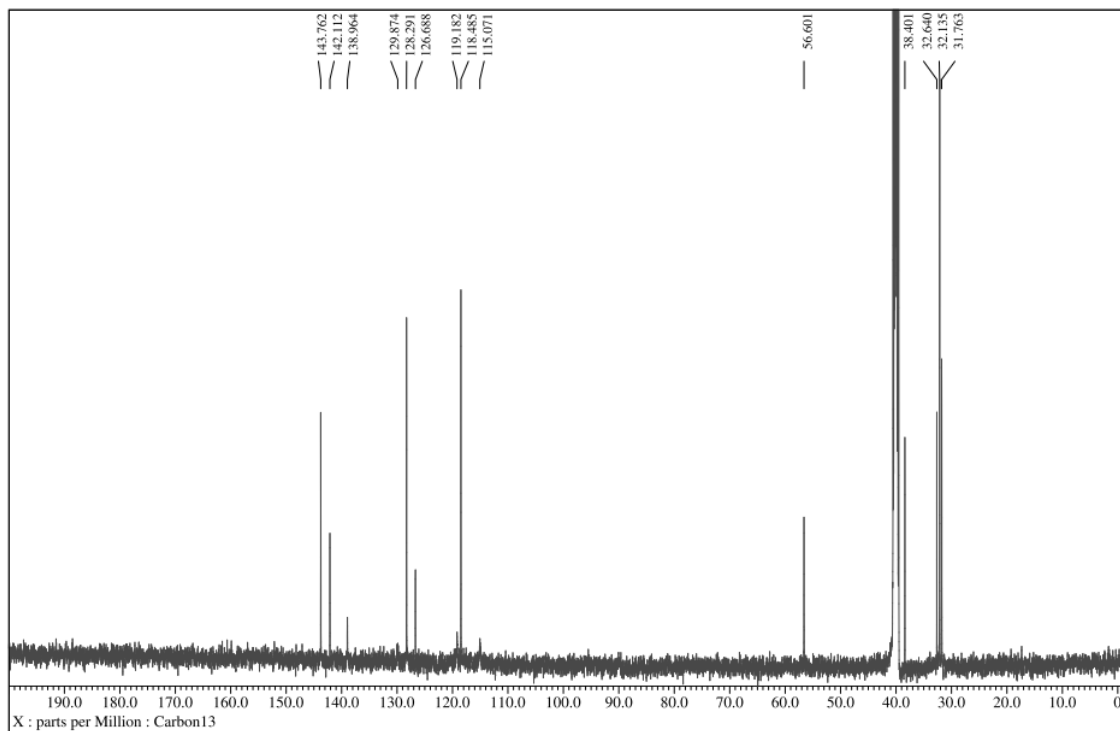

**Fig. S23**  $^{13}\text{C}$  NMR spectra of **6** (125 MHz,  $\text{DMSO-}d_6$ , 298K).

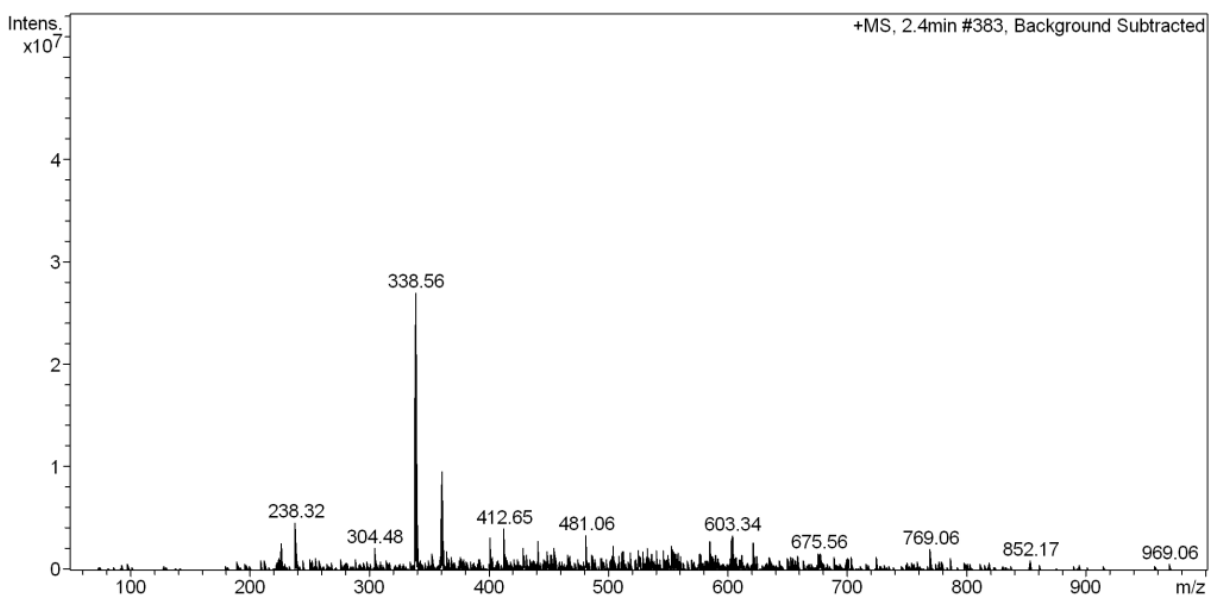

**Fig. S24** ESI MS-spectra for **6**.

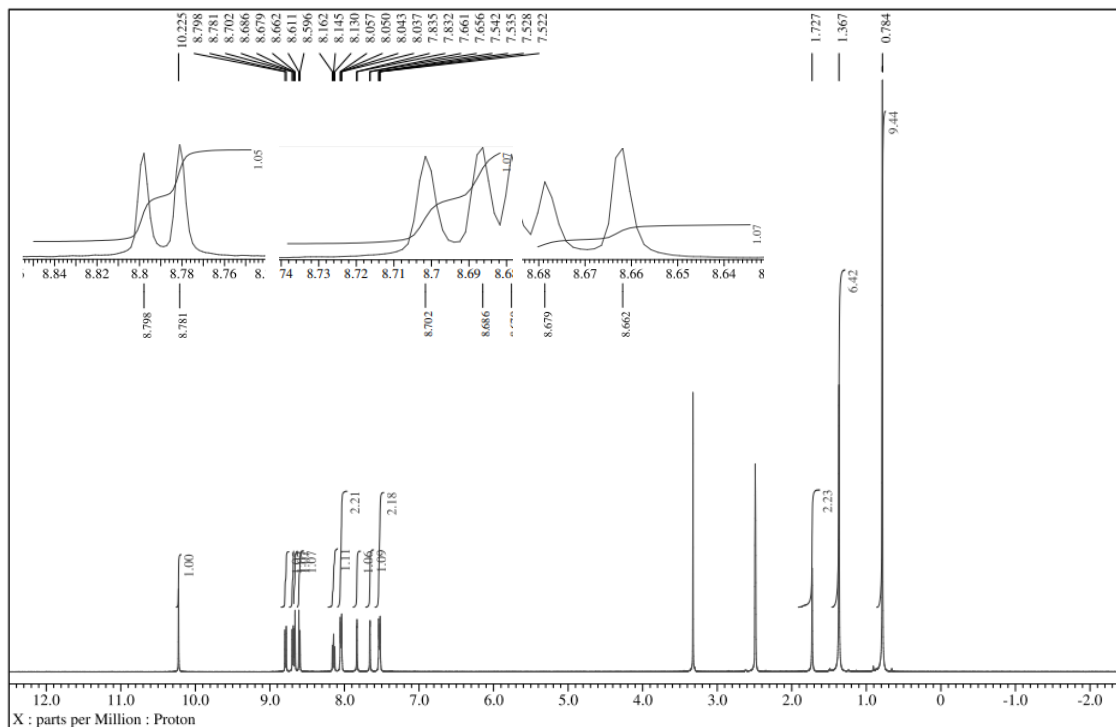

**Fig. S25**  $^1\text{H}$  NMR spectra of **7** (500 MHz,  $\text{DMSO-d}_6$ , 298K).

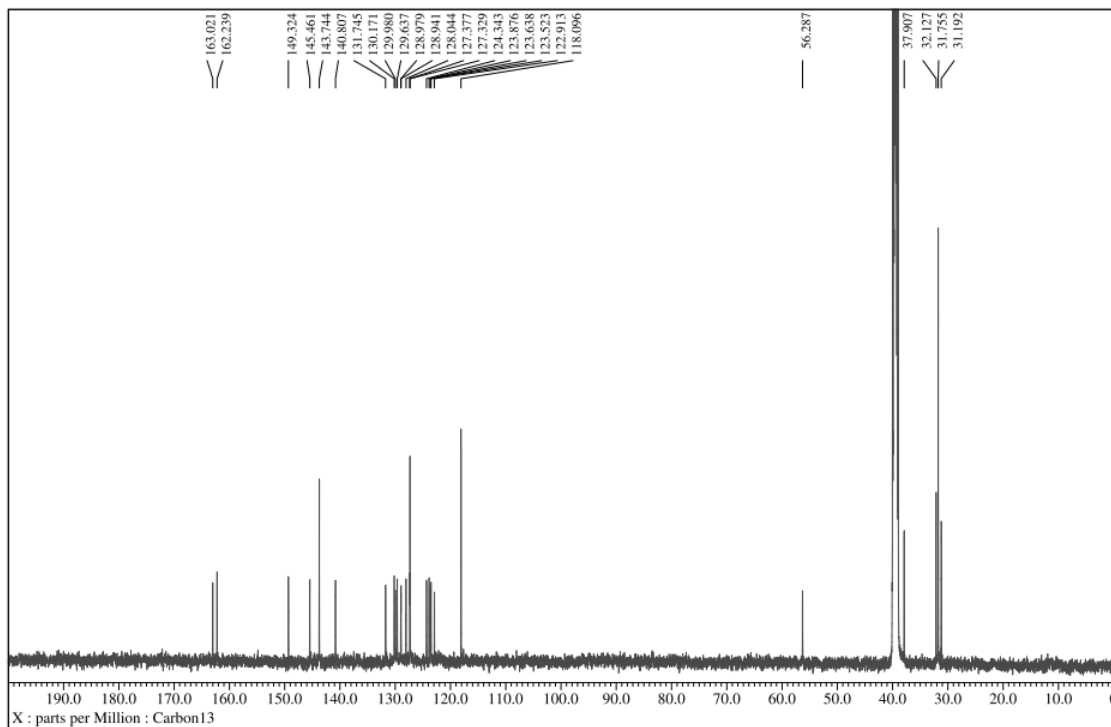

**Fig. S26**  $^{13}\text{C}$  NMR spectra of **7** (125 MHz,  $\text{DMSO-d}_6$ , 298K).

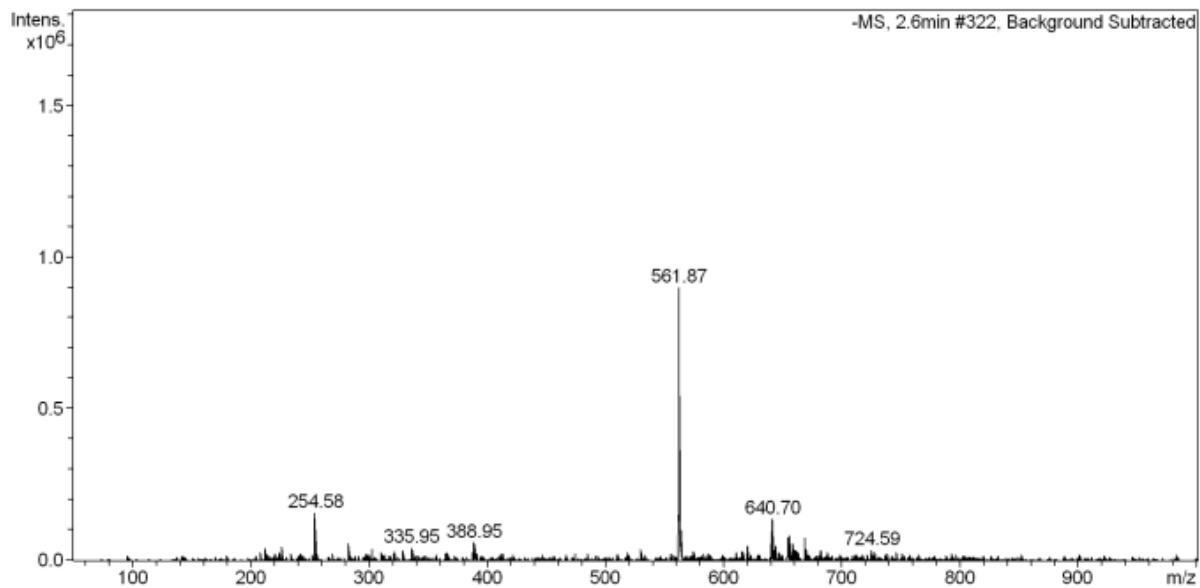

**Fig. S27** ESI MS-spectra for **7**.

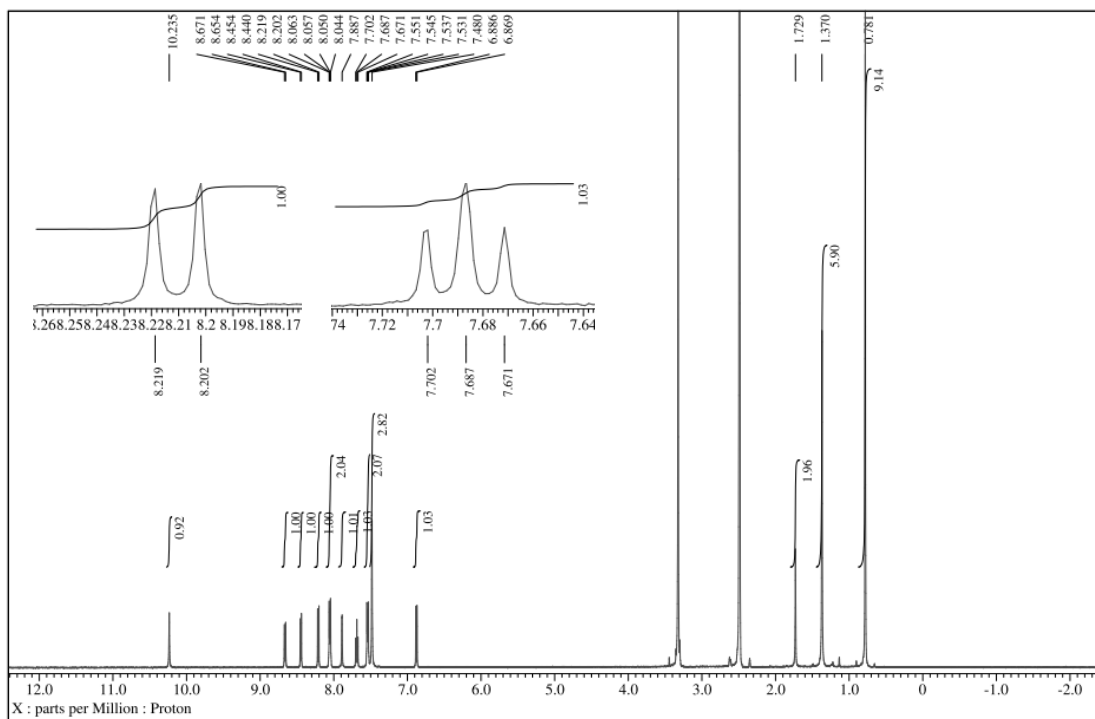

**Fig. S28** <sup>1</sup>H NMR spectra of **8** (500 MHz, DMSO-*d*<sub>6</sub>, 298K).

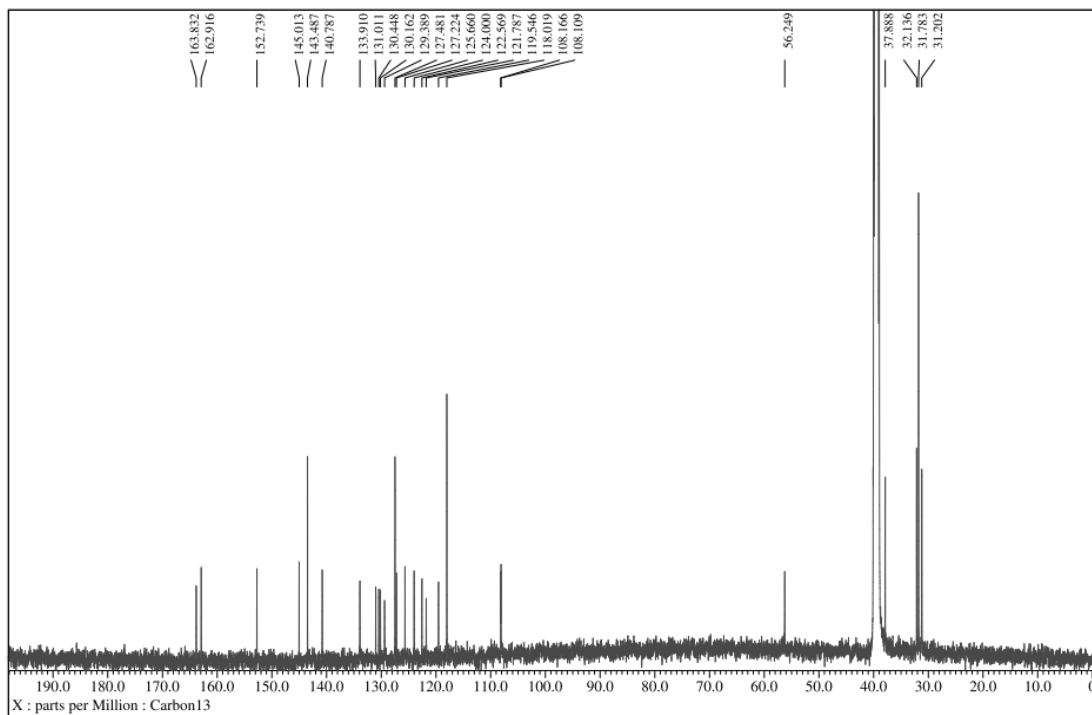

**Fig. S29**  $^{13}\text{C}$  NMR spectra of **8** (125 MHz,  $\text{DMSO-}d_6$ , 298K).

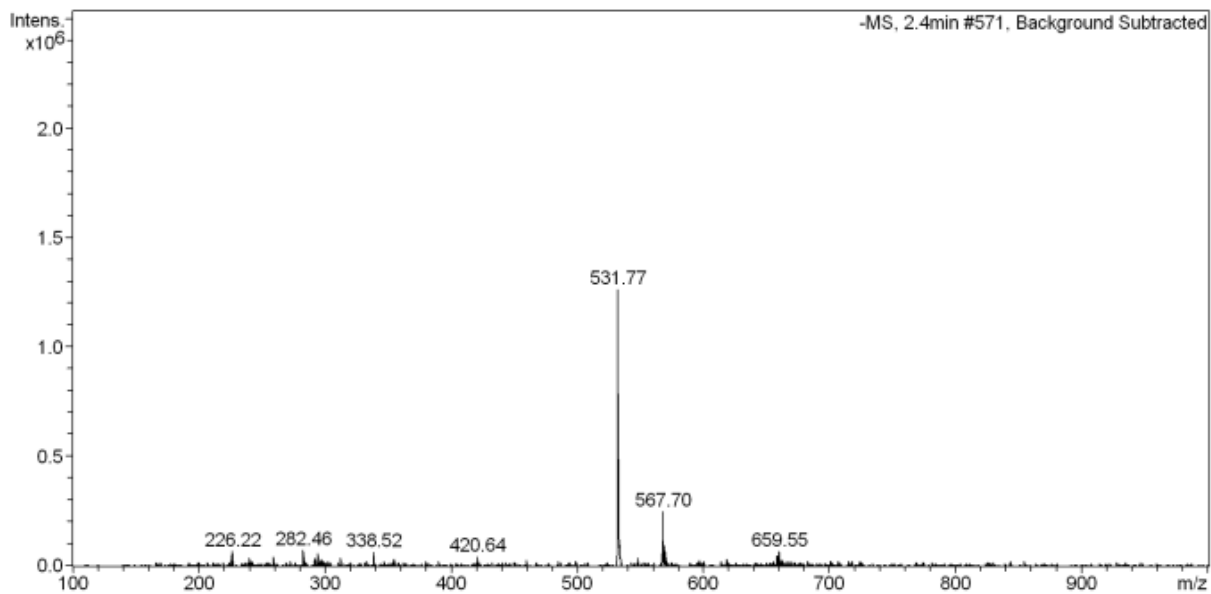

**Fig. S30** ESI MS-spectra for **8**.

## References

1. Gaussian 09, Revision **A.1**, Frisch, M. J.; Trucks, G. W.; Schlegel, H. B.; Scuseria, G. E.; Robb, M. A.; Cheeseman, J. R.; Scalmani, G.; Barone, V.; Mennucci, B.; Petersson, G. A.; Nakatsuji, H.; Caricato, M.; Li, X.; Hratchian, H. P.; Izmaylov, A. F.; Bloino, J.; Zheng, G.; Sonnenberg, J. L.; Hada, M.; Ehara, M.; Toyota, K.; Fukuda, R.; Hasegawa, J.; Ishida, M.; Nakajima, T.; Honda, Y.; Kitao, O.; Nakai, H.; Vreven, T.; Montgomery, Jr., J. A.; Peralta, J. E.; Ogliaro, F.; Bearpark, M.; Heyd, J. J.; Brothers, E.; Kudin, K. N.; Staroverov, V. N.; Kobayashi, R.; Normand, J.; Raghavachari, K.; Rendell, A.; Burant, J. C.; Iyengar, S. S.; Tomasi, J.; Cossi, M.; Rega, N.; Millam, N. J.; Klene, M.; Knox, J. E.; Cross, J. B.; Bakken, V.; Adamo, C.; Jaramillo, J.; Gomperts, R.; Stratmann, R. E.; Yazyev, O.; Austin, A. J.; Cammi, R.; Pomelli, C.; Ochterski, J. W.; Martin, R. L.; Morokuma, K.; Zakrzewski, V. G.; Voth, G. A.; Salvador, P.; Dannenberg, J. J.; Dapprich, S.; Daniels, A. D.; Farkas, Ö.; Foresman, J. B.; Ortiz, J. V.; Cioslowski, J.; Fox, D. J. Gaussian, Inc., Wallingford CT, 2009.
